# Supplementary material
Source: Springer Nature journal article supplement (https://www.springermedizin.de/resource/supplementary/12904_2012_131_MOESM1_ESM.pdf/9517582)
Supplement: MOESM1 [file 9517582]

MNDAWA contacts researcher with contact information for MND participant who has expressed an interest in the study

**MND Participant**

Initial Session:  
Explain study and obtain consent  
ALS-CBS

**Family Carer**

Initial Session:  
Explain study and obtain consent, ALS-CBS  
If family carer does not wish to participate, MND participant can proceed.

Score of >10 on ALS-CBS, MND participant and family carer excluded from study

Continued Initial Session:

Patient Demographic and Health Questionnaire

ALSAQ-5 health assessment  
Herth Hope Index  
FACIT-sp  
Patient Dignity Inventory

Dignity therapy session(s)

(1-2 days later)

Review and Editing of Dignity therapy transcript

(2-3 days later)

Return and Review Dignity therapy Transcript

(2-3 days later)

One week post-intervention

Patient Feedback Questionnaire  
ALSAQ-5 health assessment  
Herth Hope Index  
FACIT-sp  
Patient Dignity Inventory

Continued Initial Session:

Family Carer Demographic and Health Questionnaire

ALSFRS-R  
Herth Hope Index  
Zarit Burden Interview  
Hospital Anxiety and Depression Scale

One week post-intervention

Family Carer Feedback Questionnaire  
ALSFRS-R  
Herth Hope Index  
Zarit Burden Interview  
Hospital Anxiety and Depression Scale
